# Supplementary material
Source: PubMed Central journal article supplement (PMC5036996)
Supplement: NIHMS777690-supplement-01.pdf [file NIHMS777690-supplement-01.pdf]

## Praxis Representation in Lefthanders

**Supplemental Figure 1.** Region-of-Interest Analyses. Mean % signal change values within each ROI are plotted relative to the resting baseline for the 3 study conditions: planning transitive actions (tool use pantomimes), intransitive gestures, and the linguistic control task. (A, C, E, G, I) The dominant left hand. (B, D, F, H, J) The non-dominant right hand. They are put next to each other for making direct comparisons easier. Asterisks indicate differences with Bonferroni-corrected P values of at least 0.05 (\*), 0.01 (\*\*), or 0.001 (\*\*\*)

**Supplemental Figure 2.** Hand effects in gesture-planning activity. (A) Left-handers and (B) right-handers in the right panel. In both samples of participants, in sharp contrast to the execution phase (see Fig. 5), the planning of gestures for the right hand engaged the brain significantly more than for the left hand. Although left-handers seem to engage the right hemisphere significantly more in this task, the effect of overall greater activity for the right hand is independent of handedness. The inverse contrasts were empty in both groups.
